# Supplementary material for: Vaccine Knowledge, Awareness and Hesitancy: A Cross Sectional Survey among Parents Residing at Sandakan District, Sabah
Source: MDPI journal article supplement (doi:10.3390/vaccines9111348), 2021-11-17
Supplement: s1 [file s1]

## ***Supplementary material***

### ***Questionnaire***

#### ***PART 1 Parent's socio-demographic***

*Please tick (/) in the appropriate box*

|                           |                                              |                                             |                                        |                                         |
|---------------------------|----------------------------------------------|---------------------------------------------|----------------------------------------|-----------------------------------------|
| <i>Gender</i>             | <input type="checkbox"/> Male                | <input type="checkbox"/> Female             |                                        |                                         |
| <i>Age</i>                | _____                                        |                                             |                                        |                                         |
| <i>Marital status</i>     | <input type="checkbox"/> Married             | <input type="checkbox"/> Divorced           | <input type="checkbox"/> Widow/Widower |                                         |
| <i>Number of children</i> | _____                                        |                                             |                                        |                                         |
| <i>Race</i>               | <input type="checkbox"/> Malay               | <input type="checkbox"/> Chinese            | <input type="checkbox"/> Indian        | <input type="checkbox"/> Others (_____) |
| <i>Religion</i>           | <input type="checkbox"/> Islam               | <input type="checkbox"/> Buddhism           | <input type="checkbox"/> Christianity  | <input type="checkbox"/> Others (_____) |
| <i>Place of living</i>    | <input type="checkbox"/> Rural               | <input type="checkbox"/> Urban              |                                        |                                         |
| <i>Employment Status</i>  | <input type="checkbox"/> Employed            | <input type="checkbox"/> Unemployed         |                                        |                                         |
| <i>Educational level</i>  | <input type="checkbox"/> No formal education | <input type="checkbox"/> Primary school     |                                        |                                         |
|                           | <input type="checkbox"/> Secondary school    | <input type="checkbox"/> Tertiary education |                                        |                                         |
| <i>Family income</i>      | <input type="checkbox"/> Less than RM2000    | <input type="checkbox"/> RM2000 – RM5000    |                                        |                                         |
|                           | <input type="checkbox"/> RM5000 – RM10000    | <input type="checkbox"/> More than RM10000  |                                        |                                         |

Please answer all the following:

**PART 2(a)**

Please tick (/) in the appropriate box.

| No. | Questions                                                                    | Yes | No | Don't Know |
|-----|------------------------------------------------------------------------------|-----|----|------------|
| 1   | Healthy children do not need immunization.                                   |     |    |            |
| 2   | There are different types of vaccines.                                       |     |    |            |
| 3   | Active immunization is a killed or weakened form of a disease-causing agent. |     |    |            |
| 4   | Vaccination is for all ages.                                                 |     |    |            |
| 5   | Children get too many vaccines in the first two years of life.               |     |    |            |
| 6   | The immunization of the children should be started at birth.                 |     |    |            |
| 7   | In some health situations, vaccines should not be given.                     |     |    |            |
| 8   | Vaccines can be given in combination.                                        |     |    |            |
| 9   | If the child receives extra immunization, it is more effective and safer.    |     |    |            |
| 10  | More than one dose of vaccine may be required for complete protection.       |     |    |            |

**PART 2(b)**

Please tick (/) in the appropriate box.

| No. | Questions                                                                       | Yes | No |
|-----|---------------------------------------------------------------------------------|-----|----|
| 1   | Were you informed about vaccination?                                            |     |    |
| 2   | Did you read about vaccination in the media?                                    |     |    |
| 3   | Did you see a television programme about vaccination?                           |     |    |
| 4   | Did you hear about vaccination on the radio?                                    |     |    |
| 5   | Did you read about vaccination on the internet?                                 |     |    |
| 6   | Did you obtain information about vaccination from an antenatal clinic?          |     |    |
| 7   | Did you obtain information about vaccination from a maternity hospital or home? |     |    |
| 8   | Do you think you have access to enough information on immunization?             |     |    |
| 9   | Do you know your child's immunization appointment?                              |     |    |
| 10  | Is it important to follow immunization schedule?                                |     |    |

PART 2(c)

Please tick (/) in the appropriate box.

| No. | Questions                                                                                          | Yes | No | Don't Know |
|-----|----------------------------------------------------------------------------------------------------|-----|----|------------|
| 1   | Have you ever delayed having your child get a shot for reasons other than illness or allergy?      |     |    |            |
| 2   | Have you ever decided not to have your child get a shot for reasons other than illness or allergy? |     |    |            |

|   |                                                                                              |   |   |   |   |                 |   |   |   |   |    |
|---|----------------------------------------------------------------------------------------------|---|---|---|---|-----------------|---|---|---|---|----|
| 3 | How sure are you that following the recommended shot schedule is a good idea for your child? |   |   |   |   |                 |   |   |   |   |    |
|   | Not at all sure                                                                              |   |   |   |   | Completely sure |   |   |   |   |    |
|   | 0                                                                                            | 1 | 2 | 3 | 4 | 5               | 6 | 7 | 8 | 9 | 10 |
|   |                                                                                              |   |   |   |   |                 |   |   |   |   |    |

|   |                                                                                            |                           |                 |                          |                             |
|---|--------------------------------------------------------------------------------------------|---------------------------|-----------------|--------------------------|-----------------------------|
| 4 | <i>Children get more shots than are good for them.</i>                                     |                           |                 |                          |                             |
|   | <i>Strongly disagree</i>                                                                   | <i>Disagree</i>           | <i>Not sure</i> | <i>Agree</i>             | <i>Strongly agree</i>       |
|   |                                                                                            |                           |                 |                          |                             |
| 5 | <i>I believe that many of the illnesses that shots prevent are severe.</i>                 |                           |                 |                          |                             |
|   | <i>Strongly disagree</i>                                                                   | <i>Disagree</i>           | <i>Not sure</i> | <i>Agree</i>             | <i>Strongly agree</i>       |
|   |                                                                                            |                           |                 |                          |                             |
| 6 | <i>It is better for my child to develop immunity by getting sick than to get a shot.</i>   |                           |                 |                          |                             |
|   | <i>Strongly disagree</i>                                                                   | <i>Disagree</i>           | <i>Not sure</i> | <i>Agree</i>             | <i>Strongly agree</i>       |
|   |                                                                                            |                           |                 |                          |                             |
| 7 | <i>It is better for children to get fewer vaccines at the same time.</i>                   |                           |                 |                          |                             |
|   | <i>Strongly disagree</i>                                                                   | <i>Disagree</i>           | <i>Not sure</i> | <i>Agree</i>             | <i>Strongly agree</i>       |
|   |                                                                                            |                           |                 |                          |                             |
| 8 | <i>How concerned are you that your child might have a serious side effect from a shot?</i> |                           |                 |                          |                             |
|   | <i>Very concerned</i>                                                                      | <i>Somewhat concerned</i> | <i>Not sure</i> | <i>Not too concerned</i> | <i>Not concerned at all</i> |
|   |                                                                                            |                           |                 |                          |                             |
| 9 | <i>How concerned are you that any one of the childhood shots might not be safe?</i>        |                           |                 |                          |                             |
|   | <i>Very concerned</i>                                                                      | <i>Somewhat concerned</i> | <i>Not sure</i> | <i>Not too concerned</i> | <i>Not concerned at all</i> |
|   |                                                                                            |                           |                 |                          |                             |

|    |                                                                         |                           |                 |                          |                             |
|----|-------------------------------------------------------------------------|---------------------------|-----------------|--------------------------|-----------------------------|
| 10 | <i>How concerned are you that a shot might not prevent the disease?</i> |                           |                 |                          |                             |
|    | <i>Very concerned</i>                                                   | <i>Somewhat concerned</i> | <i>Not sure</i> | <i>Not too concerned</i> | <i>Not concerned at all</i> |
|    |                                                                         |                           |                 |                          |                             |

|    |                                                                                                  |            |           |                   |
|----|--------------------------------------------------------------------------------------------------|------------|-----------|-------------------|
|    | <i>Question</i>                                                                                  | <i>Yes</i> | <i>No</i> | <i>Don't Know</i> |
| 11 | <i>If you had another infant today, would you want him/her to get all the recommended shots?</i> |            |           |                   |

|    |                                                                                       |                          |                 |                         |                            |
|----|---------------------------------------------------------------------------------------|--------------------------|-----------------|-------------------------|----------------------------|
| 12 | <i>Overall, how hesitant about childhood shots would you consider yourself to be?</i> |                          |                 |                         |                            |
|    | <i>Very hesitant</i>                                                                  | <i>Somewhat hesitant</i> | <i>Not sure</i> | <i>Not too hesitant</i> | <i>Not hesitant at all</i> |
|    |                                                                                       |                          |                 |                         |                            |

|    |                                                                                    |                 |                 |              |                       |
|----|------------------------------------------------------------------------------------|-----------------|-----------------|--------------|-----------------------|
| 13 | <i>I trust the information I receive about shots.</i>                              |                 |                 |              |                       |
|    | <i>Strongly disagree</i>                                                           | <i>Disagree</i> | <i>Not sure</i> | <i>Agree</i> | <i>Strongly agree</i> |
|    |                                                                                    |                 |                 |              |                       |
| 14 | <i>I am able to openly discuss my concerns about shots with my child's doctor.</i> |                 |                 |              |                       |
|    | <i>Strongly disagree</i>                                                           | <i>Disagree</i> | <i>Not sure</i> | <i>Agree</i> | <i>Strongly agree</i> |
|    |                                                                                    |                 |                 |              |                       |

|    |                                                                          |   |   |   |   |                        |   |   |   |   |    |
|----|--------------------------------------------------------------------------|---|---|---|---|------------------------|---|---|---|---|----|
| 15 | <i>All things considered, how much do you trust your child's doctor?</i> |   |   |   |   |                        |   |   |   |   |    |
|    | <i>Not at all sure</i>                                                   |   |   |   |   | <i>Completely sure</i> |   |   |   |   |    |
|    | 0                                                                        | 1 | 2 | 3 | 4 | 5                      | 6 | 7 | 8 | 9 | 10 |
|    |                                                                          |   |   |   |   |                        |   |   |   |   |    |

*PART 2(d) Child's immunization schedule record*

*Date of birth:*

*Gender:*

| <i>Age</i>       | <i>Vaccine</i>  | <i>Date of vaccination</i> |
|------------------|-----------------|----------------------------|
| <i>Birth</i>     | BCG             |                            |
|                  | Hepatitis B (1) |                            |
| <i>1 month</i>   | Hepatitis B (2) |                            |
| <i>2 months</i>  | DPT (1)         |                            |
|                  | Hib (1)         |                            |
|                  | IPV (1)         |                            |
| <i>3 months</i>  | DPT (2)         |                            |
|                  | Hib (2)         |                            |
|                  | IPV (2)         |                            |
| <i>5 months</i>  | DPT (3)         |                            |
|                  | Hib (3)         |                            |
|                  | IPV (3)         |                            |
| <i>6 months</i>  | Hepatitis B (3) |                            |
|                  | Measles         |                            |
| <i>9 months</i>  | MMR (1)         |                            |
| <i>12 months</i> | MMR (2)         |                            |
| <i>18 months</i> | DPT (B)         |                            |
|                  | Hib (B)         |                            |
|                  | IPV (B)         |                            |

Date of data collection: \_\_\_\_\_
